# Supplementary material for: Immunofibroblasts regulate LTα3 expression in tertiary lymphoid structures in a pathway dependent on ICOS/ICOSL interaction
Source: PubMed Central journal article supplement (PMC9068764; doi:10.1038/s42003-022-03344-6), 2022-05-04
Supplement: 42003_2022_3344_MOESM1_ESM.pdf [file 42003_2022_3344_MOESM1_ESM.pdf]

**Manuscript: Immunofibroblasts regulate lymphotoxin alpha 3 expression in tertiary lymphoid structures in a pathway dependent on ICOS/ICOS-L interaction.**

**SUPPLEMENTARY INFORMATION**

**Supplementary Figure Legends**

**Supplementary Fig. 1.** LT $\beta$  expression within salivary glands during TLS formation. (a) qPCR analysis of Lt $\beta$  mRNA transcripts from wt (black bars) salivary glands at day 0, 3 hours, 6 hours, day 1, day 2, day 5, day 8 and day 15 p.c. Gene expression was normalized to housekeeping gene  $\beta$ -actin and expressed as RQ values relative to day 0 mRNA transcripts results. (b) Representative dot plot of flow cytometry isotype control staining for LT $\alpha$  expression by CD45<sup>+</sup> cells in wt and Lt $\alpha$ <sup>-/-</sup> salivary glands at day 5 p.c. (c) Representative dot plot of flow cytometry staining for surface (S) and intracellular (IC) LT $\alpha$  expression in wt glands at day 5 p.c. (d) qPCR analysis of Lt $\beta$  mRNA transcripts from wt (black bars) and Cd3 $\epsilon$ <sup>-/-</sup> (dark grey bars) salivary glands at day 5, 8 and day 15 p.c. Gene expression was normalized to housekeeping gene  $\beta$ -actin and expressed as RQ values relative to day 0 mRNA transcripts results. (e) qPCR analysis of ccl19, ccl21 and cxcl13 mRNA transcripts in pdpn<sup>+</sup> fibroblasts from wt (black bars), Lt $\beta$ r<sup>-/-</sup> (blue bars) and Lt $\alpha$ <sup>-/-</sup> (grey bars) salivary glands at day 5 p.c. Gene expression was normalized to housekeeping gene  $\beta$ -actin. (f) tnfr $\alpha$  mRNA expression in FACS sorted CD45-EpCAM-CD31-pdpn<sup>+</sup> immunofibroblasts at day 0, 5, 8 and 15 p.c. mRNA transcripts were assessed by quantitative real time PCR and normalized to housekeeping gene  $\beta$ actin. RQ values were calculated with calibrator day 0 CD45-EpCAM-CD31-pdpn<sup>+</sup> fibroblasts. Data are mean  $\pm$  s.e.m from two independent experiments with four to six mice analyzed per group. \*\* p < 0.01; \*\*\* p < 0.001, one-way ANOVA with Dunnett's multiple comparison test (a and f), oneway ANOVA with Tukey's multiple comparison test (e) and unpaired t test (d).

**Supplementary Fig. 2.** Other lymphoid cytokines and immunofibroblast induction are intact in Icosl<sup>-/-</sup> mice. (a) Representative dot plot of flow cytometry isotype control staining for ICOS expression by CD45<sup>+</sup> cells in wt salivary glands at day 5 p.c. (b) qPCR analysis of mRNA transcripts Lt $\beta$  and tnfr $\alpha$  in CD3<sup>+</sup> cells from wt (black bars) and Icosl<sup>-/-</sup> (white bars) mice at day 5 p.c. Transcripts were normalized to  $\beta$ -actin and expressed relative to day 0 CD45<sup>+</sup> results. (c) Graph showing absolute number of podoplanin (pdpn)<sup>+</sup> immunofibroblasts in day 5 p.c. salivary glands of wt (black bars) and Icosl<sup>-/-</sup> (white bars) mice. (d) representative flow cytometry plots showing LT $\beta$  staining within CD3<sup>+</sup>

of wt (black bars) and *Icosl*<sup>-/-</sup> (white bars). Data are mean  $\pm$  s.e.m from two independent experiments with four to six mice analyzed per group. n.s. non-significant, unpaired t test.

**Supplementary Fig. 3.** Immunofibroblasts in TLS express ICOSL. (a) Graph showing absolute number and percentage of ICOSL<sup>+</sup> cells in different cell populations (pdpn<sup>+</sup> immunofibroblasts, pdpn<sup>-</sup> cells, CD11c<sup>+</sup> dendritic cells, EpCAM<sup>+</sup> epithelial cells and CD31<sup>+</sup> endothelial cells) within a wt salivary gland at day 5 p.c. (b) Quantitative real time PCR analysis of *cxcl13* mRNA in wt (black bars), *Icosl*<sup>-/-</sup> mice reconstituted with wt bone marrow (grey bars) and wt mice reconstituted with *Icosl*<sup>-/-</sup> bone marrow (white bars). mRNA transcripts were normalized to housekeeping gene  $\beta$ -actin. Data shown are mean  $\pm$  s.e.m of two independent experiments with three to five mice analyzed per group. \*  $p < 0.05$ ; \*\*  $p < 0.01$ , one-way ANOVA with Tukey's multiple comparison test (b).

**Supplementary Fig. 4.** ICOS/ICOSL expression within salivary glands of Sjögren's patients. (a) Representative flow cytometry plots for ICOS expression in T lymphocytes and its distribution within CD4 and CD8 T cells within mSGs of Sjögren's patients. Isotype control staining is also shown. (b-d) Representative microphotographs of human salivary glands of patients diagnosed with Sjögren's syndrome double stained with anti ICOS (brown in b) or ICOSL (brown in c and pink in d) and CD3 (pink in b), CD11c (pink in c) and PDPN (brown in d). (e-f) Representative RNAscope microphotographs of human salivary glands of patients with Sjögren's syndrome with PDPN (red), CD11c (yellow) and ICOSLRNA (e) or DapBRNA (f) (green). (g) Graph showing absolute number and percentage of ICOSLRNA<sup>+</sup> cells in pdpn<sup>+</sup> immunofibroblasts and CD11c<sup>+</sup> dendritic cells in with Sjögren's patient salivary gland.

**Supplementary Fig. 5.** Lymphocytes infiltrating salivary glands of Sjögren's Syndrome patients express LT $\alpha$ 3. (a) Representative flow cytometry plots showing LT $\alpha$ 3 producing CD3<sup>+</sup> and CD19<sup>+</sup> lymphocytes within mSGs of Sjögren's patients. Isotype control staining is also shown

**Supplementary Fig. 6.** LT $\alpha$  expression in serum is not a good predictor of local inflammation within salivary glands of Sjögren's patients. (a) Graph showing serum levels of LT $\alpha$  in sicca (clear squares) and Sjögren's Syndrome patients. (black squares). Data are representative as mean  $\pm$  s.d., Mann-Whitney test. (b) Univariate analysis showing that serum LT $\alpha$  cannot be used as a predictor value for

Sjögren's Syndrome. (c) Spearman's correlation test shows lack of correlation between serum and saliva levels of  $LT\alpha$ .

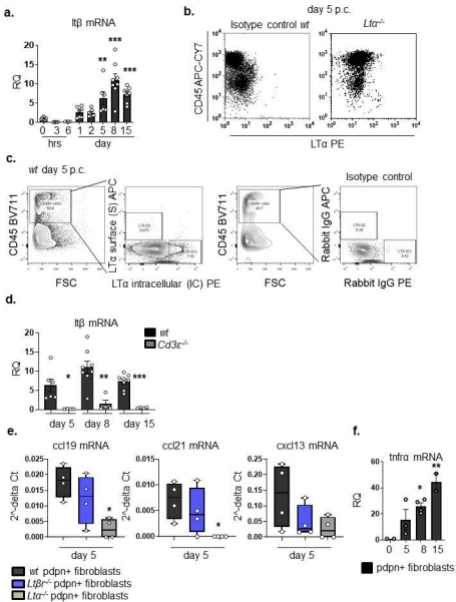

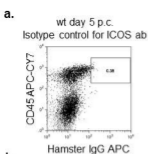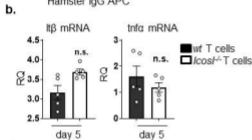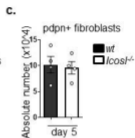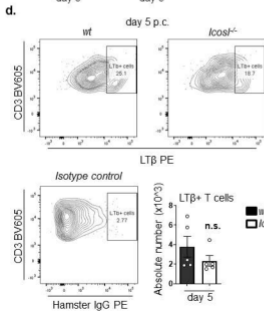

**a.**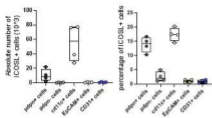**b.**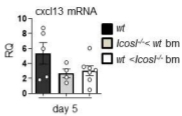

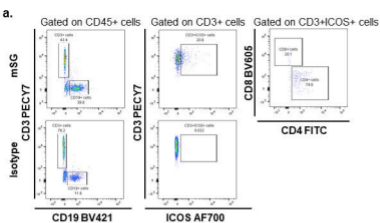

**b.** CD3 / ICOS

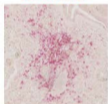

**c.** CD11c / ICOSL

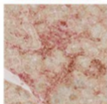

**d.** ICOSL / pdpn

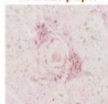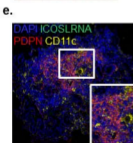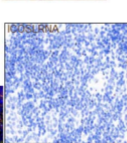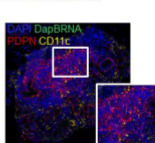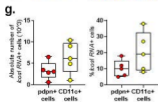

**a.**

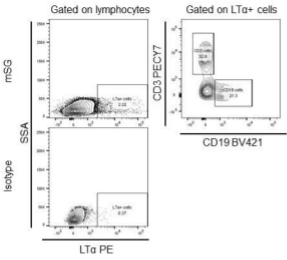



**a.**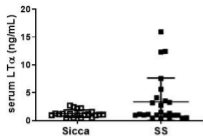**b.**

|     | Unadjusted model                            |                | Adjusted model                            |                |
|-----|---------------------------------------------|----------------|-------------------------------------------|----------------|
|     | <i>Coeff. <math>\beta</math> (97.5% CI)</i> | <i>p value</i> | <i>Coeff. <math>\beta</math> (95% CI)</i> | <i>p value</i> |
| Lta | 0.87 (0.67, 1.04)                           | 0.20           | -                                         | -              |

Results of univariate analysis (unadjusted model) logistic regression of serum predictors of Sjögren syndrome.

**c.**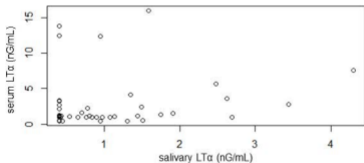

Spearman's rank correlation rho

**Supplementary Table 1: Saliva proteins in Sjögren's Syndrome and Sicca patients**

|              | SS patients               | Sicca patients            | p-value        |
|--------------|---------------------------|---------------------------|----------------|
| hGDNF        | 1.01 (1.01 – 1.18)        | 1.01 (1.01 – 1.01)        | 0.030§         |
| CDCP1        | 7.06 (6.47 - 7.74)        | 6.32 (5.90 - 6.71)        | 0.00016*       |
| IL 6         | 6.06 (5.17 – 6.98)        | 5.43 (4.50 - 5.90)        | 0.033§         |
| CXCL11       | 5.18 (2.57 - 6.12)        | 3.00 (1.77 - 4.56)        | 0.027§         |
| CXCL9        | 9.07 (7.96 - 11.77)       | 8.20 (7.67 - 9.02)        | 0.025§         |
| CCL4         | 3.82 (2.56 - 4.40)        | 2.22 (1.81 - 3.22)        | 0.023§         |
| <b>CCL19</b> | <b>4.53 (2.40 – 5.90)</b> | <b>2.63 (1.47 - 3.39)</b> | <b>0.0025*</b> |
| IL 15RA      | 0.65 (0.44 - 1.02)        | 0.39 (0.36 - 0.64)        | 0.0077§        |
| IL 10RB      | 4.49 (4.23 - 5.23)        | 4.32 (4.16 - 4.87)        | 0.046*         |
| PD-L1        | 2.32 (1.96 - 2.84)        | 2.03 (1.68 - 2.33)        | 0.0013§        |
| RANKL        | 2.29 (1.40 - 3.29)        | 1.49 (0.96 - 1.75)        | 0.00015§       |
| IL 12β       | 1.99 (0.82 - 3.98)        | 0.90 (0.55 - 1.42)        | 0.0069*        |
| IL 13        | 0.75 (0.75 – 0.75)        | 0.75 (0.75 – 0.75)        | 0.049*         |
| MMP-10       | 9.06 (7.05 - 10.49)       | 7.84 (7.21 - 8.43)        | 0.0010*        |
| CD5          | 3.95 (3.31 – 4.70)        | 3.47 (3.11 - 3.82)        | 0.014§         |
| MIP-1α       | 3.19 (2.13 - 4.08)        | 2.19 (1.30 - 3.96)        | 0.020§         |
| Flt3L        | 3.74 (2.84 - 4.54)        | 3.16 (2.64 - 3.36)        | 0.016§         |
| CXCL10       | 9.67 (7.61 - 12.60)       | 7.66 (6.18 - 9.80)        | 0.027§         |
| CD40         | 9.18 (8.49 - 10.09)       | 8.86 (8.33 - 9.31)        | 0.032*         |
| CCL20        | 6.84 (5.57 - 8.60)        | 4.99 (4.06 - 6.33)        | 0.0024§        |
| <b>LTα</b>   | <b>1.00 (0.42 - 2.09)</b> | <b>0.42 (0.40 - 0.78)</b> | <b>0.0013*</b> |

Continuous values are expressed as medians (25th–75th percentile)

§Wilcoxon rank-sum test

\* Chi-square test

**Supplementary Table 2: Univariate analysis (unadjusted model) logistic regression and multivariate analysis (adjusted model) of saliva predictors of Sjögren's syndrome.**

|                | Unadjusted model                            |                | Adjusted model                            |                |
|----------------|---------------------------------------------|----------------|-------------------------------------------|----------------|
|                | <i>Coeff. <math>\beta</math> (97,5% CI)</i> | <i>p value</i> | <i>Coeff. <math>\beta</math> (95% CI)</i> | <i>p value</i> |
| <b>CCL19</b>   | <b>-0.34 (-0.62, -0.11)</b>                 | <b>0.0076</b>  | -                                         | -              |
| CXCL11         | -0.24 (-0.48, -0.038)                       | 0.0031         | -                                         | -              |
| CXCL9          | -0.39 (-0.72, -0.10)                        | 0.012          | -                                         | -              |
| CDCP1          | -0.89 (-1.55, -0.32)                        | 0.0042         | -                                         | -              |
| IL15 RA        | -2.20 (-4.20, -0.59)                        | 0.015          | -                                         | -              |
| PD-L1          | -1.15 (-2.22, -0.36)                        | 0.016          | -                                         | -              |
| RANKL          | -1.16 (-1.99, -0.50)                        | 0.0020         | -                                         | -              |
| IL12 $\beta$   | -0.72 (-1.30, -0.25)                        | 0.0061         | -                                         | -              |
| MMP-10         | -0.42 (-0.79, -0.098)                       | 0.016          | -                                         | -              |
| CD5            | -0.67 (-1.30, -0.15)                        | 0.020          | -                                         | -              |
| MIP-1 $\alpha$ | -0.34 (-0.69, -0.039)                       | 0.041          | -                                         | -              |
| Ft3L           | -0.72 (-1.35, -0.22)                        | 0.011          | -                                         | -              |
| CXCL10         | -0.20 (-0.40, -0.030)                       | 0.028          | -                                         | -              |
| CD40           | -0.58 (-1.18, -0.054)                       | 0.041          | -                                         | -              |
| CCL20          | -0.30 (-0.56, -0.076)                       | 0.014          | -                                         | -              |
| <b>LTA</b>     | <b>-1.56 (-2.77, -0.66)</b>                 | <b>0.0031</b>  | <b>-3.93 (-7.87, -1.13)</b>               | <b>0.020</b>   |

**Supplementary Table 3: Mouse flow cytometry antibodies**

| Target                           | Fluorochrome                                | Clone            | Supplier                                 | Panel         |
|----------------------------------|---------------------------------------------|------------------|------------------------------------------|---------------|
| CD45 (all isoforms)<br>LCA, Ly-5 | PERCPeCy5.5/<br>PECy7/<br>APC-<br>Cy7/BV711 | 30-F11           | ebiosciences                             | surface       |
| Podoplanin (gp38)                | PE/PECy7                                    | ebio8.1.1        | ebiosciences                             | surface       |
| CD31 (PECAM-1)                   | FITC/PECy7                                  | 390              | ebiosciences                             | surface       |
| CD326 (EpCAM)                    | APC/PECy7                                   | G8.8             | ebiosciences                             | surface       |
| CD3e                             | PECy7                                       | 145-2C11         | BD biosciences                           | surface       |
| B220 (CD45R)                     | PB/APCCy7                                   | RA3-6B2          | BD biosciences                           | surface       |
| CD4                              | efluor 450                                  | RM4-5            | ebiosciences                             | surface       |
| CD8a                             | PE-TexasRed                                 | 53-6.7           | BD biosciences                           | surface       |
| CD19                             | APC                                         | eBio1D3<br>(1D3) | ebiosciences                             | surface       |
| NK1.1                            | FITC                                        | PK136            | ebiosciences                             | surface       |
| CD11c                            | PE/PECy7                                    | N418             | ebiosciences                             | surface       |
| ICOS                             | APC/AF700                                   | 15F9/C398.<br>4A | Biologend                                | surface       |
| ICOSL                            | PE/Biotin                                   | HK5.3            | Biologend                                | surface       |
| IL13                             | PE/efluor450                                | eBio13A          | ebiosciences                             | intracellular |
| IL22                             | AF647                                       | Poly5164         |                                          | intracellular |
| LTA                              | unconjugated                                | aa49-202         | LSBio                                    | intracellular |
| LTB                              | unconjugated                                | BBF6             | Kind gift from<br>Prof. Jeff<br>Browning | surface       |
| Donkey anti-rabbit               | RPE                                         | -                | Southern Biotech                         | intracellular |
| Donkey anti-rabbit               | APC                                         | -                | Life<br>Technologies                     | surface       |
| Goat anti-armenian<br>hamster    | PE                                          |                  | BD                                       | surface       |

**Supplementary Table 4: Human flow cytometry antibodies**

| <b>Target</b>       | <b>Fluorochrome</b> | <b>Clone</b> | <b>Supplier</b> | <b>Panel</b>  |
|---------------------|---------------------|--------------|-----------------|---------------|
| CD15                | BV510               | W6D3         | Biolegend       | surface       |
| CD14                | V500                | M5E2         | BD Horizon      | surface       |
| Zombie              | Aqua                |              | Biolegend       | surface       |
| CD03                | FITC                | HIT3A        | Biolegend       | surface       |
| CD4                 | PE-dazzle594        | RPA-T4       | Biolegend       | surface       |
| CD8                 | PercP Cy5.5         | RPA-T8       | BD              | surface       |
| CD16                | APC Cy7             | 3G8          | Biolegend       | surface       |
| CD19                | BV605               | HIB19        | Biolegend       | surface       |
| CD56                | BV785               | 5.1 H11      | BioLegend       | surface       |
| ICOS                | PE Cy7              | C398.4A      | Biolegend       | surface       |
| Lta (TNF- $\beta$ ) | PE                  | 359-81-11    | Biolegend       | intracellular |
| Mouse (IgG1, k)     | PE                  | P3.6.2.8.1   | eBioscience     | intracellular |
