# Supplementary material for: Immunofibroblasts regulate LTα3 expression in tertiary lymphoid structures in a pathway dependent on ICOS/ICOSL interaction
Source: PubMed Central journal article supplement (PMC9068764; doi:10.1038/s42003-022-03344-6), 2022-05-04
Supplement: 42003_2022_3344_MOESM2_ESM.pdf [file 42003_2022_3344_MOESM2_ESM.pdf]

## Description of Additional Supplementary Files

**File name:** Supplementary Data 1

**Description:** Source data.
